# Supplementary material
Source: publisher figshare collection journal article supplement (https://gsajournals.figshare.com/ndownloader/files/28005738)
Supplement: Supplementary file 1 [file 28005738]

**
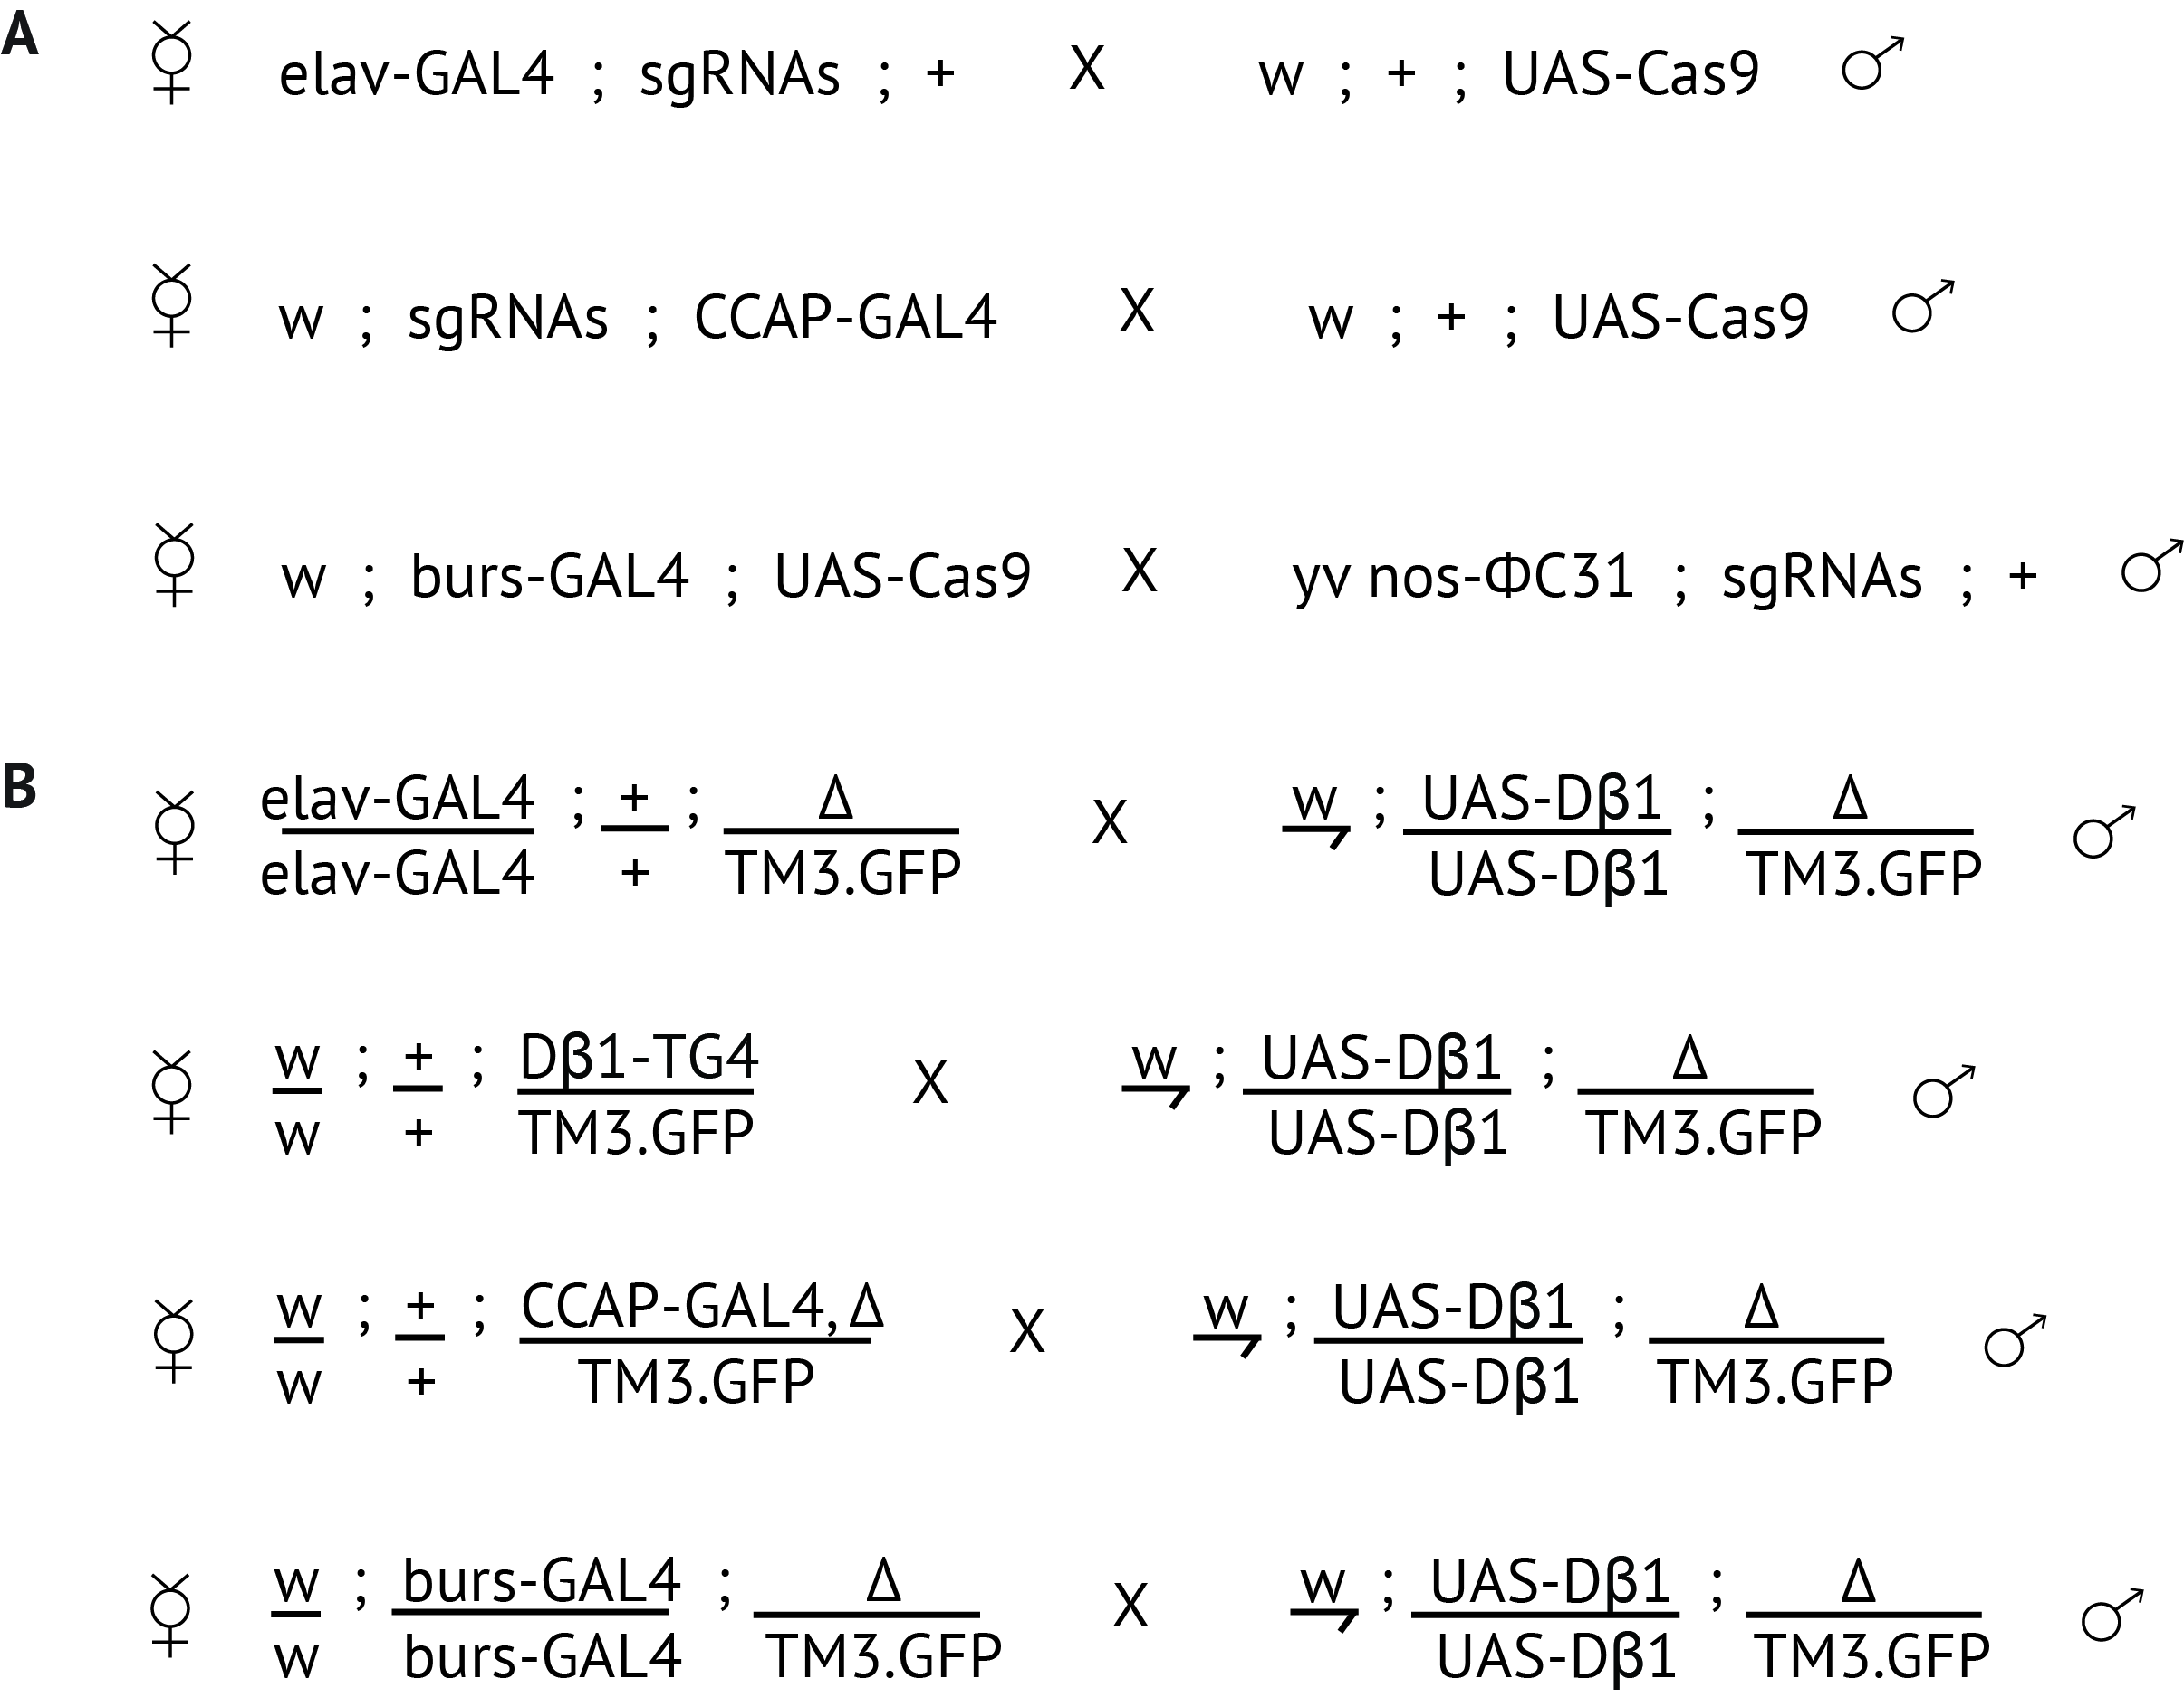
**

**Figure S3 Crosses performed in tissue-specific somatic CRISPR and tissue-specific rescue experiments**

A list of the crosses performed for (A) tissue-specific somatic CRISPR experiments, and (B) tissue-specific rescue experiments. “sgRNAs” always refers to the pair of sgRNAs present in *pCFD4-Dβ1* (*5’UTR_sgRNA/sgRNA2*). The deletion (Δ) used in all rescue crosses is *Dβ1Δex5*. All fly strains are described in Tables S1 and S2.
